# Supplementary material
Source: PubMed Central journal article supplement (PMC6112004)
Supplement: zjb999094867s1.pdf [file zjb999094867s1.pdf]

## Supplementary materials

### **The Mla pathway plays an essential role in the intrinsic resistance of *Burkholderia cepacia* complex species to antimicrobials and host innate components**

Steve P. Bernier<sup>1\*</sup>, Susie Son<sup>1</sup>, and Michael G. Surette<sup>1,2\*</sup>

<sup>1</sup>*Department of Medicine, Farncombe Family Digestive Health Research Institute, Faculty of Health Sciences, McMaster University, Hamilton, Ontario, Canada.*

<sup>2</sup>*Department of Biochemistry and Biomedical Sciences, Faculty of Health Sciences, McMaster University, Hamilton, Ontario, Canada.*

Running title:

# **Corresponding authors:** Steve P. Bernier ([sbernier19@gmail.com](mailto:sbernier19@gmail.com))  
Michael G. Surette ([surette@mcmaster.ca](mailto:surette@mcmaster.ca))

**Supplementary Tables**

**Table S1.** Antibiotic resistance profile of *B. cenocepacia* K56-2 transposon mutants selected for their sensitivity to *P. aeruginosa* spent medium on agar surface

| Strain/mutant ID | Gene <sup>a</sup> | Antibiotic <sup>b</sup> |        |        |        |
|------------------|-------------------|-------------------------|--------|--------|--------|
|                  |                   | AZM 15                  | FEP 30 | IPM 10 | TOB 10 |
| WT K56-2         | -                 | 6                       | 27     | 9      | 6      |
| 15G6             | BCAL0179          | 6                       | 25     | 10     | 6      |
| 36D7             | BCAL0179          | 6                       | 21     | 8      | 6      |
| 37A8             | BCAL0182          | 6                       | 23     | 8      | 6      |
| 25E5             | BCAL0302          | 23                      | 24     | 10     | 6      |
| 30G10            | BCAL0305          | 29                      | 26     | 6      | 6      |
| 2C5              | BCAL0305          | 26                      | 26     | 13     | 6      |
| 12C7             | BCAL0499          | 6                       | 26     | 14     | 6      |
| 14C3             | BCAL1048          | 6                       | 26     | 9      | 6      |
| 37B7             | BCAL1172          | 6                       | 22     | 7      | 6      |
| 28H12            | BCAL1246          | 6                       | 22     | 7      | 6      |
| 37H7             | BCAL3225          | 6                       | 21     | 8      | 6      |
| 2D10             | BCAL3252          | 6                       | 26     | 10     | 6      |
| 35H10            | BCAL3252          | 6                       | 22     | 8      | 6      |
| 4E2              | BCAL3336          | 6                       | 27     | 11     | 6      |
| 8H11             | BCAM0275a         | 6                       | 24     | 11     | 6      |
| 13F4             | BCAM0324          | 6                       | 26     | 8      | 6      |
| 16H4             | BCAM1948          | 6                       | 24     | 8      | 6      |
| 24C3             | BCAM2426          | 6                       | 26     | 11     | 6      |
| 17F3             | BCAM2618          | 6                       | 26     | 11     | 6      |
| 33C6             | BCAM2620          | 6                       | 22     | 7      | 6      |

<sup>a</sup> Gene affected by the transposon insertion as described in Table 1.

<sup>b</sup> Zone of clearing in millimeters (mm) around the disk after 24 h. When no zone was present, the size of the disk (6 mm) was recorded. Abbreviations of the antibiotics tested with their concentration in µg on each disk in parentheses are as follow: azithromycin (AZM 15), cefepime (FEP 30), imipenem (IPM 10), and tobramycin (TOB 10).

**Table S2.** Antibiotic resistance profiles of *B. cenocepacia* K56-2 mutants

| Antibiotic class/Antibiotic   | [ug] | WT | <i>mlaE</i> | <i>mlaC</i> | BCAL0499 |
|-------------------------------|------|----|-------------|-------------|----------|
| <b>Penicillins</b>            |      |    |             |             |          |
| Ampicillin (AMP)              | 2    | 6  | N.D.        | 6           | N.D.     |
|                               | 10   | 6  | N.D.        | 6           | N.D.     |
|                               | 25   | 6  | 6           | 6           | 6        |
| Amoxicillin-clavulanate (AMC) | 30   | 6  | 6           | 6           | 6        |
| Penicillin (P)                | 10   | 6  | N.D.        | 6           | N.D.     |
| <b>Cephalosporins</b>         |      |    |             |             |          |
| Cefepime (FEP)                | 30   | 28 | 29          | 28          | 28       |
| Cefoxitin (FOX)               | 30   | 6  | 6           | 6           | 6        |
| Ceftazidime (CAZ)             | 30   | 39 | 39          | 37          | 40       |
| Ceftriaxone (CRO)             | 30   | 27 | 29          | 26          | 27       |
| <b>Carbapenems</b>            |      |    |             |             |          |
| Imipenem (IPM)                | 10   | 12 | 13          | 13          | 13       |
| Meropenem (MEM)               | 10   | 37 | 37          | 33          | 38       |
| <b>Monobactams</b>            |      |    |             |             |          |
| Aztreonam (ATM)               | 30   | 25 | 24          | 23          | 25       |
| <b>Aminoglycosides</b>        |      |    |             |             |          |
| Tobramycin (TOB)              | 10   | 6  | 6           | 6           | 6        |
| Amikacin (AK)                 | 30   | 6  | 6           | 6           | N.D.     |
| <b>Tetracyclines</b>          |      |    |             |             |          |
| Tetracycline (TE)             | 30   | 25 | 32          | 32          | 28       |
| Doxycycline (DO)              | 30   | 34 | 50          | 51          | 37       |
| Tigecycline (TGC)             | 15   | 20 | 34          | 34          | 17       |
| <b>Oxazolidinones</b>         |      |    |             |             |          |
| Linezolid (LZD)               | 10   | 6  | 6           | 6           | N.D.     |
|                               | 30   | 6  | 6           | 6           | 6        |
| <b>Chloramphenicol (C)</b>    |      |    |             |             |          |
|                               | 10   | 9  | 19          | 22          | N.D.     |
|                               | 30   | 20 | 33          | 32          | 25       |
|                               | 50   | 28 | 35          | 39          | N.D.     |
| <b>Macrolides</b>             |      |    |             |             |          |
| Azythromycin (AZM)            | 15   | 6  | 26          | 26          | 6        |
| Clarithromycin (CLR)          | 2    | 6  | N.D.        | 7           | N.D.     |
|                               | 5    | 6  | N.D.        | 15          | N.D.     |
|                               | 15   | 6  | 25          | 22          | 6        |
| Erythromycin (E)              | 15   | 6  | 21          | 19          | 6        |
| <b>Lincosamides</b>           |      |    |             |             |          |
| Clindamycin (DA)              | 2    | 6  | 6           | 6           | 6        |
| <b>Fluoroquinolones</b>       |      |    |             |             |          |
| Ciprofloxacin (CIP)           | 5    | 24 | 37          | 38          | 25       |
| Levofloxacin (LEV)            | 5    | 22 | 38          | 42          | N.D.     |
| <b>Rifampicin (RD)</b>        |      |    |             |             |          |
|                               | 5    | 6  | 26          | 27          | 6        |
| <b>Others</b>                 |      |    |             |             |          |
| Piperacillin/tazobactam (TZP) | 110  | 40 | 42          | 40          | 42       |
| Fosfomycin (FOS)              | 50   | 6  | 6           | 6           | 6        |

Zone of clearing in millimeters (mm) around the disk after 24 h are reported. When no zone was present, the size of the disk (6 mm) was recorded. Gray zones represent antibiotics for which *mlaE* and *mlaC* insertional mutants are more sensitive than their WT parent.

**Table S3.** The Mla pathway and antibiotic resistance in *E. coli* K-12

| <b>Antibiotic</b> | <b>[ug]</b> | <b>Zone of clearing (mm)<sup>a</sup></b> |                                 |                                 |                                 |                                 |                                 |                                 |
|-------------------|-------------|------------------------------------------|---------------------------------|---------------------------------|---------------------------------|---------------------------------|---------------------------------|---------------------------------|
|                   |             | <b>WT</b>                                | <b><math>\Delta mlaA</math></b> | <b><math>\Delta mlaC</math></b> | <b><math>\Delta mlaD</math></b> | <b><math>\Delta mlaE</math></b> | <b><math>\Delta yadG</math></b> | <b><math>\Delta yadH</math></b> |
| Azythromycin      | 15          | 17                                       | 17                              | 16                              | 16                              | 15                              | 16                              | 16                              |
| Erythromycin      | 15          | 10                                       | 11                              | 11                              | 10                              | 11                              | 10                              | 10                              |
| Clarithromycin    | 5           | 6                                        | 6                               | 6                               | 6                               | 6                               | 6                               | 6                               |
| Rifampicin        | 5           | 13                                       | 13                              | 14                              | 13                              | 13                              | 12                              | 15                              |
| Ciprofloxacin     | 5           | 37                                       | 37                              | 36                              | 38                              | 35                              | 37                              | 37                              |
| Levofloxacin      | 5           | 35                                       | 34                              | 34                              | 38                              | 35                              | 35                              | 35                              |
| Chloramphenicol   | 30          | 28                                       | 30                              | 31                              | 29                              | 30                              | 28                              | 28                              |
| Tetracycline      | 30          | 32                                       | 32                              | 31                              | 31                              | 31                              | 33                              | 32                              |
| Tigecycline       | 15          | 30                                       | 30                              | 30                              | 31                              | 30                              | 30                              | 31                              |
| Doxycycline       | 30          | 29                                       | 30                              | 30                              | 30                              | 30                              | 30                              | 31                              |

<sup>a</sup>Zone of clearing in millimeters (mm) around the disk after 24 h are reported. When no zone was present, the size of the disk (6 mm) was recorded.

Deletion mutants of *E. coli* strain BW25113 (WT) are from the Keio collection (1) and described in Table S5.

**Table S4.** The Mla/VacJ pathway and antibiotic resistance in *P. aeruginosa*

| <b>Antibiotic</b> | <b>[ug]</b> | <b>Zone of clearing (mm)<sup>a</sup></b> |                    |                    |                    |                    |                    |               |               |
|-------------------|-------------|------------------------------------------|--------------------|--------------------|--------------------|--------------------|--------------------|---------------|---------------|
|                   |             | <b>WT</b>                                | <b><i>vacJ</i></b> | <b><i>mlaC</i></b> | <b><i>mlaD</i></b> | <b><i>mlaE</i></b> | <b><i>mlaF</i></b> | <b>PA2811</b> | <b>PA2812</b> |
| Azythromycin      | 15          | 6                                        | 6                  | 6                  | 6                  | 6                  | 6                  | 6             | 6             |
| Erythromycin      | 15          | 6                                        | 6                  | 6                  | 6                  | 6                  | 6                  | 6             | 6             |
| Clarithromycin    | 5           | 6                                        | 6                  | 6                  | 6                  | 6                  | 6                  | 6             | 6             |
| Rifampicin        | 5           | 6                                        | 6                  | 6                  | 6                  | 6                  | 6                  | 6             | 6             |
| Ciprofloxacin     | 5           | 43                                       | 44                 | 44                 | 44                 | 44                 | 44                 | 42            | 41            |
| Levofloxacin      | 5           | 38                                       | 40                 | 40                 | 40                 | 40                 | 40                 | 37            | 37            |
| Chloramphenicol   | 30          | 26                                       | 26                 | 28                 | 27                 | 27                 | 27                 | 15            | 13            |
| Tetracycline      | 30          | 34                                       | 37                 | 35                 | 35                 | 36                 | 34                 | 31            | 32            |
| Tigecycline       | 15          | 31                                       | 35                 | 34                 | 34                 | 34                 | 33                 | 32            | 32            |
| Doxycycline       | 30          | 32                                       | 36                 | 35                 | 35                 | 35                 | 36                 | 31            | 32            |

<sup>a</sup>Zone of clearing in millimeters (mm) around the disk after 24 h. When no zone was present, the size of the disk (6 mm) was recorded.

Transposon mutants of *P. aeruginosa* strain PA14 (WT) are from (2) and described in Table S5.

**Table S5.** Microbial strains and plasmids used in this study.

| Strain or Plasmid                  | Relevant characteristics - genotype <sup>a</sup>                                                                                                                                                                                               | Reference or Source |
|------------------------------------|------------------------------------------------------------------------------------------------------------------------------------------------------------------------------------------------------------------------------------------------|---------------------|
| <b>Strains</b>                     |                                                                                                                                                                                                                                                |                     |
| <i>E. coli</i>                     |                                                                                                                                                                                                                                                |                     |
| DH5 $\alpha$                       | F <sup>-</sup> <i>endA1 glnV44 thi-1 recA1 relA1 gyrA96 deoR nupG purB20</i><br>$\Phi$ 80 <i>dlacZ</i> $\Delta$ M15 $\Delta$ ( <i>lacZYA-argF</i> )U169, <i>hsdR17</i> (r <sub>K</sub> <sup>-</sup> m <sub>K</sub> <sup>+</sup> ), $\lambda$ - | Invitrogen          |
| HB101                              | F <sup>-</sup> <i>mcrB mrr hsdS20</i> (r <sub>B</sub> <sup>-</sup> m <sub>B</sub> <sup>-</sup> ) <i>recA13 leuB6 ara-14 proA2</i><br><i>lacY1 galK2 xyl-5 mtl-1 rpsL20</i> (Sm <sup>R</sup> ) <i>glnV44</i> $\lambda$ -                        | Lab collection      |
| BW25113                            | <i>E. coli</i> K-12 derivative                                                                                                                                                                                                                 | (1)                 |
| $\Delta$ <i>mlaF</i>               | BW25113 $\Delta$ <i>mlaF</i> ::KmFRT; Km <sup>R</sup> ; mutant ID (JW3162)                                                                                                                                                                     | (1)                 |
| $\Delta$ <i>mlaE</i>               | BW25113 $\Delta$ <i>mlaE</i> ::KmFRT; Km <sup>R</sup> ; mutant ID (JW3161)                                                                                                                                                                     | (1)                 |
| $\Delta$ <i>mlaD</i>               | BW25113 $\Delta$ <i>mlaD</i> ::KmFRT; Km <sup>R</sup> ; mutant ID (JW3160)                                                                                                                                                                     | (1)                 |
| $\Delta$ <i>mlaC</i>               | BW25113 $\Delta$ <i>mlaC</i> ::KmFRT; Km <sup>R</sup> ; mutant ID (JW3159)                                                                                                                                                                     | (1)                 |
| $\Delta$ <i>mlaA</i>               | BW25113 $\Delta$ <i>mlaA</i> ::KmFRT; Km <sup>R</sup> ; mutant ID (JW2343)                                                                                                                                                                     | (1)                 |
| $\Delta$ <i>yadG</i>               | BW25113 $\Delta$ <i>yadG</i> ::KmFRT; Km <sup>R</sup> ; mutant ID (JW0123)                                                                                                                                                                     | (1)                 |
| $\Delta$ <i>yadH</i>               | BW25113 $\Delta$ <i>yadH</i> ::KmFRT; Km <sup>R</sup> ; mutant ID (JW0124)                                                                                                                                                                     | (1)                 |
| <i>S. cerevisiae</i> INVSc1        | <i>MATa his3</i> $\Delta$ 1 <i>leu2 trp1-289 ura3-52</i>                                                                                                                                                                                       | Invitrogen          |
| <i>P. aeruginosa</i>               |                                                                                                                                                                                                                                                |                     |
| PA14                               | Wild-type (WT); Burn patient isolate                                                                                                                                                                                                           | (3)                 |
| $\Delta$ <i>lasR</i>               | PA14 $\Delta$ <i>lasR</i> ; In-frame deletion of <i>lasR</i>                                                                                                                                                                                   | (4)                 |
| <i>rhlR</i>                        | PA14 <i>rhlR</i> ::Tet; Disruption of <i>rhlR</i> ; Tet <sup>R</sup>                                                                                                                                                                           | (4, 5)              |
| $\Delta$ <i>pqsR</i>               | PA14 $\Delta$ <i>pqsR</i> ; In-frame deletion of <i>pqsR</i>                                                                                                                                                                                   | (6)                 |
| $\Delta$ <i>phz</i>                | PA14 $\Delta$ <i>phzA1-G1</i> $\Delta$ <i>phzA2-G2</i> ; In-frame deletion of the two<br><i>phzA-G</i> operons                                                                                                                                 | (7)                 |
| $\Delta$ <i>rhlA</i>               | PA14 <i>rhlA</i> ::Gm; Internal deletion of <i>rhlA</i> ; Gm <sup>R</sup>                                                                                                                                                                      | (8-10)              |
| $\Delta$ <i>hcnABC</i>             | PA14 $\Delta$ <i>hcnABC</i>                                                                                                                                                                                                                    | (11)                |
| <i>mlaC</i> ; ( <i>mlaC</i> ::TnM) | PA14_PA14_57840::TnM; mutant ID (41806); PA4453                                                                                                                                                                                                | (2)                 |
| <i>mlaD</i> ; ( <i>mlaD</i> ::TnM) | PA14_PA14_57850::TnM; mutant ID (41030); PA4454                                                                                                                                                                                                | (2)                 |
| <i>mlaE</i> ; ( <i>mlaE</i> ::TnM) | PA14_PA14_57870::TnM; mutant ID (40312); PA4455                                                                                                                                                                                                | (2)                 |
| <i>mlaF</i> ; ( <i>mlaF</i> ::TnM) | PA14_PA14_57880::TnM; mutant ID (27857); PA4456                                                                                                                                                                                                | (2)                 |
| <i>vacJ</i> ; ( <i>vacJ</i> ::TnM) | PA14_PA14_27920::TnM; mutant ID (52739); PA2800                                                                                                                                                                                                | (2)                 |
| PA2811; PA2811::TnM                | PA14_PA14_27780::TnM; mutant ID (35140); PA2811                                                                                                                                                                                                | (2)                 |
| PA2812; PA2812::TnM                | PA14_PA14_27770::TnM; mutant ID (34523); PA2812                                                                                                                                                                                                | (2)                 |
| <i>B. cenocepacia</i>              |                                                                                                                                                                                                                                                |                     |
| K56-2                              | Wild-type; CF sputum isolate (Canada)                                                                                                                                                                                                          | (12, 13)            |
| <i>mlaE</i> ; ( <i>mlaE</i> ::Tp)  | K56-2 with pMQ87Tp inserted into <i>mlaE</i> (BCAL0302); Tp <sup>R</sup>                                                                                                                                                                       | This study          |
| <i>mlaC</i> ; ( <i>mlaC</i> ::Tp)  | K56-2 with pMQ87Tp inserted into <i>mlaC</i> (BCAL0305); Tp <sup>R</sup>                                                                                                                                                                       | This study          |
| BCAL0499; (BCAL0499::Tp)           | K56-2 with pMQ87Tp inserted into BCAL0499; Tp <sup>R</sup>                                                                                                                                                                                     | This study          |
| K56-2-15G6                         | BCAL0179::Tn <i>rhaBout</i> derivative of K56-2; Tp <sup>R</sup>                                                                                                                                                                               | This study          |
| K56-2-36D7                         | BCAL0179::Tn <i>rhaBout</i> derivative of K56-2; Tp <sup>R</sup>                                                                                                                                                                               | This study          |
| K56-2-37A8                         | BCAL0182::Tn <i>rhaBout</i> derivative of K56-2; Tp <sup>R</sup>                                                                                                                                                                               | This study          |
| K56-2-25E5                         | BCAL0302::Tn <i>rhaBout</i> derivative of K56-2; Tp <sup>R</sup>                                                                                                                                                                               | This study          |
| K56-2-30G10                        | BCAL0305::Tn <i>rhaBout</i> derivative of K56-2; Tp <sup>R</sup>                                                                                                                                                                               | This study          |
| K56-2-2C5                          | BCAL0305::Tn <i>rhaBout</i> derivative of K56-2; Tp <sup>R</sup>                                                                                                                                                                               | This study          |
| K56-2-12C7                         | BCAL0499::Tn <i>rhaBout</i> derivative of K56-2; Tp <sup>R</sup>                                                                                                                                                                               | This study          |
| K56-2-14C3                         | BCAL1048::Tn <i>rhaBout</i> derivative of K56-2; Tp <sup>R</sup>                                                                                                                                                                               | This study          |
| K56-2-37B7                         | BCAL1172::Tn <i>rhaBout</i> derivative of K56-2; Tp <sup>R</sup>                                                                                                                                                                               | This study          |
| K56-2-28H12                        | BCAL1246::Tn <i>rhaBout</i> derivative of K56-2; Tp <sup>R</sup>                                                                                                                                                                               | This study          |
| K56-2-37H7                         | (BCAL3225)::Tn <i>rhaBout</i> derivative of K56-2; Tp <sup>R</sup>                                                                                                                                                                             | This study          |
| K56-2-2D10                         | (BCAL3252)::Tn <i>rhaBout</i> derivative of K56-2; Tp <sup>R</sup>                                                                                                                                                                             | This study          |
| K56-2-35H10                        | (BCAL3252)::Tn <i>rhaBout</i> derivative of K56-2; Tp <sup>R</sup>                                                                                                                                                                             | This study          |
| K56-2-4E2                          | BCAL3336::Tn <i>rhaBout</i> derivative of K56-2; Tp <sup>R</sup>                                                                                                                                                                               | This study          |

|                                    |                                                                                                                                       |            |
|------------------------------------|---------------------------------------------------------------------------------------------------------------------------------------|------------|
| K56-2-8H11                         | (BCAM0275a)::TnrhaBout derivative of K56-2; Tp <sup>R</sup>                                                                           | This study |
| K56-2-13F4                         | (BCAM0324)::TnrhaBout derivative of K56-2; Tp <sup>R</sup>                                                                            | This study |
| K56-2-16H4                         | BCAM1948::TnrhaBout derivative of K56-2; Tp <sup>R</sup>                                                                              | This study |
| K56-2-24C3                         | (BCAM2426)::TnrhaBout derivative of K56-2; Tp <sup>R</sup>                                                                            | This study |
| K56-2-17F3                         | BCAM2618::TnrhaBout derivative of K56-2; Tp <sup>R</sup>                                                                              | This study |
| K56-2-33C6                         | BCAM2620::TnrhaBout derivative of K56-2; Tp <sup>R</sup>                                                                              | This study |
| <i>vacJ2</i> ; 36D10               | <i>vacJ2</i> ::TnrhaBout derivative of K56-2; BCAM2829; Tp <sup>R</sup>                                                               | This study |
| <i>B. dolosa</i>                   |                                                                                                                                       |            |
| PC543                              | CF sputum isolate (USA)                                                                                                               | (14, 15)   |
| <i>m1aC</i> ; ( <i>m1aC</i> ::Tp)  | PC543 with pMQ87Tp inserted into <i>m1aC</i> (BDSB_RS14790); Tp <sup>R</sup>                                                          | This study |
| <i>vacJ</i> ; 2A6                  | <i>vacJ</i> (BDSB_RS14795)::TnrhaBout derivative of PC543; Tp <sup>R</sup>                                                            | (16)       |
| <i>bamC</i> ; 1A2                  | <i>bamC</i> (BDSB_RS14795)::TnrhaBout derivative of PC543; Tp <sup>R</sup>                                                            | (16)       |
| Plasmids                           |                                                                                                                                       |            |
| pSCrhaBout                         | pTnMod-OTp', <i>rhaR rhaS P<sub>rhaB</sub></i> ; Tp <sup>R</sup>                                                                      | (17)       |
| pRK2013                            | Mobilizing vector, ColE1 Tra (RK2); Km <sup>R</sup>                                                                                   | (18)       |
| pMQ87Tp                            | Suicide vector, <i>URA3 CEN6/ARSH4 lacZα</i> ; Gm <sup>R</sup> , Tp <sup>R</sup>                                                      | (16)       |
| pMQ87Tp- <i>m1aE</i>               | <i>m1aE</i> (BCAL0302) insertional mutant construct in pMQ87Tp                                                                        | This study |
| pMQ87Tp- <i>m1aC</i>               | <i>m1aC</i> (BCAL0305) insertional mutant construct in pMQ87Tp                                                                        | This study |
| pMQ87Tp-BCAL0499                   | BCAL0499 insertional mutant construct in pMQ87Tp                                                                                      | This study |
| pCR <sup>®</sup> 2.1               | Cloning vector; Km <sup>R</sup> , Amp <sup>R</sup>                                                                                    | Invitrogen |
| pCR <sup>®</sup> 2.1- <i>m1aCB</i> | pCR <sup>®</sup> 2.1 with 1367-bp PCR fragment containing <i>m1aCB</i> and native promoter region; Km <sup>R</sup> , Amp <sup>R</sup> | This study |
| pHERD26T                           | Broad-host-range shuttle vector; Tet <sup>R</sup>                                                                                     | (19)       |
| pHERD26T- <i>m1aCB</i>             | pHERD26T with 1321-bp KpnI-EcoRI fragment from pCR <sup>®</sup> 2.1- <i>m1aCB</i> ; Tet <sup>R</sup>                                  | This study |

<sup>a</sup> Tn mutants with genes in parentheses indicate that the insertion was in an intergenic region and that the gene is likely the one affected by the Tn insertion. Tp, trimethoprim; Tet, tetracycline; Gm, gentamicin; Km, kanamycin; Amp, ampicillin.

**Table S6.** Primers used in this study.

| Primer      | Sequence (5'- 3')                                             | Reference      |
|-------------|---------------------------------------------------------------|----------------|
| M13F        | GTAAAACGACGGCCAGT                                             | Lab collection |
| M13R        | CAGGAAACAGCTATGAC                                             | Lab collection |
| 824         | GCCCATTTTCCTGTCAGTAACGAGA                                     | (17)           |
| BCAL0302-5L | CCAAGCTTGCATGCCTGCAGGTCGACTCTAGAGGATCCCCGAATTCTTCCCGCTGCTGCG  | This study     |
| BCAL0302-3L | AACAGCTATGACCATGATTACGAATTCGAGCTCGGTACCCCAAGTTCGCTGGTTGCGCTGC | This study     |
| BCAL0305-5L | CCAAGCTTGCATGCCTGCAGGTCGACTCTAGAGGATCCCCAGTCGAACCCGCAGGCGCTG  | This study     |
| BCAL0305-3L | AACAGCTATGACCATGATTACGAATTCGAGCTCGGTACCCCAAGTTCGCTGGTTGCGCTGC | This study     |
| BCAL0499-5L | CCAAGCTTGCATGCCTGCAGGTCGACTCTAGAGGATCCCCCTGGTGATCGACGACAACG   | This study     |
| BCAL0499-3L | AACAGCTATGACCATGATTACGAATTCGAGCTCGGTACCCTGCGGCGGTGCATGTTTCAGC | This study     |
| mlaCB-For   | GTACGACCTGCCGGAAGACG                                          | This study     |
| mlaCB-Rev   | TTGGCTGCCCCGAAAACGC                                           | This study     |



## Supplementary Figures

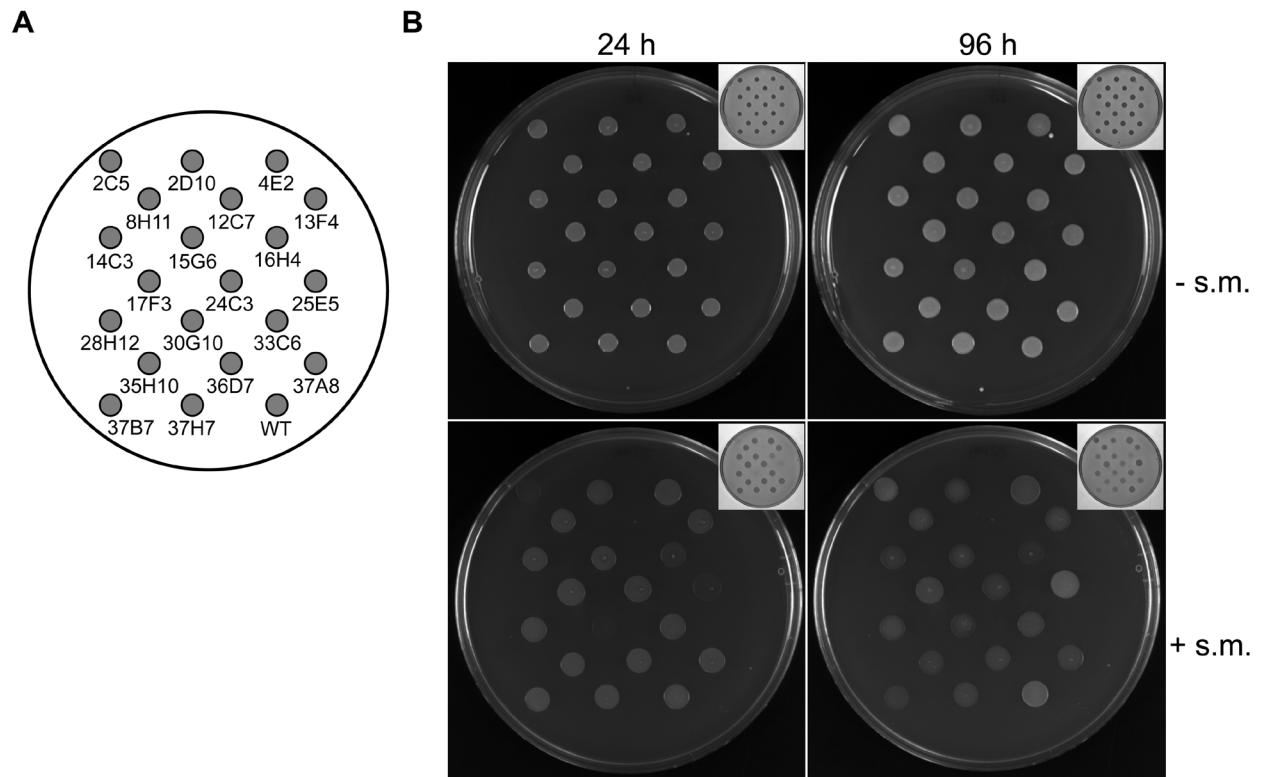

**FIG S1. Selection of hypersensitive transposon mutants.** (A) The selected transposon mutants of *B. cenocepacia* K56-2 (B) were grown for 24 h at 37°C and 72 h at room temperature with the addition of 25% spent medium (+s.m.) extracted from planktonic cultures of *P. aeruginosa* PA14 and compared to growth in absence of spent medium (- s.m.).

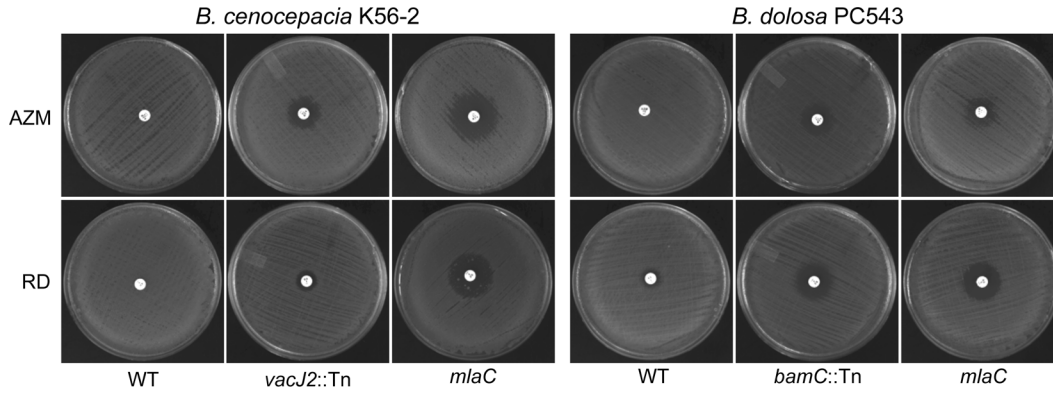

**FIG S2. Susceptibility to Gram-positive antibiotics.** Resistance profile of transposon mutants (*vacJ2* and *bamC*) selected for their susceptibility to azithromycin (AZM) and rifampicin (RD) in comparison to WT and *miaC* mutants in *B. cenocepacia* K56-2 and *B. dolosa* PC543.

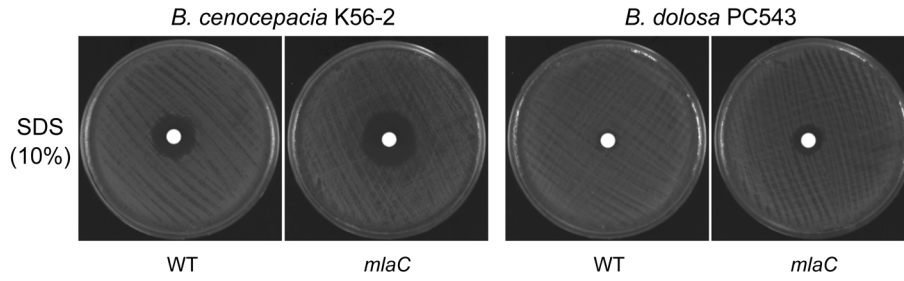

**FIG S3. Susceptibility to the SDS detergent.** The sensitivity of WT and *mlaC* mutants of *B. cenocepacia* K56-2 and *B. dolosa* PC543 was assessed on agar using 10  $\mu$ l of a 10% SDS solution on a sterile disk. Zones of inhibition are greater in *mlaC* mutants compared to WT, but WT PC543 is more resistant than WT K56-2.

## REFERENCES

1. Baba T, Ara T, Hasegawa M, Takai Y, Okumura Y, Baba M, Datsenko KA, Tomita M, Wanner BL, Mori H. 2006. Construction of *Escherichia coli* K-12 in-frame, single-gene knockout mutants: the Keio collection. *Mol Syst Biol* 2:2006 0008.
2. Liberati NT, Urbach JM, Miyata S, Lee DG, Drenkard E, Wu G, Villanueva J, Wei T, Ausubel FM. 2006. An ordered, nonredundant library of *Pseudomonas aeruginosa* strain PA14 transposon insertion mutants. *Proc Natl Acad Sci U S A* 103:2833-8.
3. Rahme LG, Stevens EJ, Wolfort SF, Shao J, Tompkins RG, Ausubel FM. 1995. Common virulence factors for bacterial pathogenicity in plants and animals. *Science* 268:1899-902.
4. Hogan DA, Vik A, Kolter R. 2004. A *Pseudomonas aeruginosa* quorum-sensing molecule influences *Candida albicans* morphology. *Mol Microbiol* 54:1212-23.
5. Hogan DA, Kolter R. 2002. *Pseudomonas-Candida* interactions: an ecological role for virulence factors. *Science* 296:2229-32.
6. Cugini C, Morales DK, Hogan DA. 2010. *Candida albicans*-produced farnesol stimulates *Pseudomonas* quinolone signal production in LasR-defective *Pseudomonas aeruginosa* strains. *Microbiology* 156:3096-107.
7. Gibson J, Sood A, Hogan DA. 2009. *Pseudomonas aeruginosa-Candida albicans* interactions: localization and fungal toxicity of a phenazine derivative. *Appl Environ Microbiol* 75:504-13.
8. Caiazza NC, Shanks RM, O'Toole GA. 2005. Rhamnolipids modulate swarming motility patterns of *Pseudomonas aeruginosa*. *J Bacteriol* 187:7351-61.
9. Pukatzki S, Kessin RH, Mekalanos JJ. 2002. The human pathogen *Pseudomonas aeruginosa* utilizes conserved virulence pathways to infect the social amoeba *Dictyostelium discoideum*. *Proc Natl Acad Sci U S A* 99:3159-64.
10. Rahim R, Ochsner UA, Olvera C, Graninger M, Messner P, Lam JS, Soberon-Chavez G. 2001. Cloning and functional characterization of the *Pseudomonas aeruginosa* *rhlC* gene that encodes rhamnosyltransferase 2, an enzyme responsible for di-rhamnolipid biosynthesis. *Mol Microbiol* 40:708-18.
11. Bernier SP, Workentine ML, Li X, Magarvey NA, O'Toole GA, Surette MG. 2016. Cyanide Toxicity to *Burkholderia cenocepacia* Is Modulated by Polymicrobial Communities and Environmental Factors. *Front Microbiol* 7:725.
12. Mahenthiralingam E, Coenye T, Chung JW, Speert DP, Govan JR, Taylor P, Vandamme P. 2000. Diagnostically and experimentally useful panel of strains from the *Burkholderia cepacia* complex. *J Clin Microbiol* 38:910-3.
13. Varga JJ, Losada L, Zelazny AM, Kim M, McCorrison J, Brinkac L, Sampaio EP, Greenberg DE, Singh I, Heiner C, Ashby M, Nierman WC, Holland SM, Goldberg JB. 2013. Draft Genome Sequences of *Burkholderia cenocepacia* ET12 Lineage Strains K56-2 and BC7. *Genome Announc* 1.
14. Coenye T, LiPuma JJ, Henry D, Hoste B, Vandemeulebroecke K, Gillis M, Speert DP, Vandamme P. 2001. *Burkholderia cepacia* genomovar VI, a new member of the *Burkholderia cepacia* complex isolated from cystic fibrosis patients. *Int J Syst Evol Microbiol* 51:271-9.
15. Workentine ML, Surette MG, Bernier SP. 2014. Draft Genome Sequence of *Burkholderia dolosa* PC543 Isolated from Cystic Fibrosis Airways. *Genome Announc* 2.

16. Bernier SP, Hum C, Li X, O'Toole GA, Magarvey NA, Surette MG. 2017. *Pseudomonas aeruginosa*-Derived Rhamnolipids and Other Detergents Modulate Colony Morphotype and Motility in the *Burkholderia cepacia* Complex. *J Bacteriol* 199.
17. Cardona ST, Mueller CL, Valvano MA. 2006. Identification of essential operons with a rhamnose-inducible promoter in *Burkholderia cenocepacia*. *Appl Environ Microbiol* 72:2547-55.
18. Figurski DH, Helinski DR. 1979. Replication of an origin-containing derivative of plasmid RK2 dependent on a plasmid function provided in trans. *Proc Natl Acad Sci U S A* 76:1648-52.
19. Qiu D, Damron FH, Mima T, Schweizer HP, Yu HD. P<sub>BAD</sub>-Based Shuttle Vectors for Functional Analysis of Toxic and Highly Regulated Genes in *Pseudomonas* and *Burkholderia* spp. and Other Bacteria. *Applied and Environmental Microbiology*. 2008;74(23):7422-7426.
